# Supplementary material for: A novel one-pot reaction involving organocopper-mediated reduction/transmetalation/asymmetric alkylation, leading to the diastereoselective synthesis of functionalized (Z)-fluoroalkene dipeptide isosteres
Source: Royal Society of Chemistry journal article supplement (doi:10.1039/b608596b), 2006-01-01

## Electronic Supplementary Information

### A novel one-pot reaction: organocopper-mediated reduction/asymmetric alkylation via transmetalation leading to the diastereoselective synthesis of (Z)-fluoroalkene dipeptide isosteres

Tetsuo Narumi<sup>†</sup>, Ayumu Niida<sup>†</sup>, Kenji Tomita<sup>†</sup>, Shinya Oishi<sup>†</sup>, Akira Otaka<sup>†, §</sup>,  
Hiroaki Ohno<sup>†</sup> and Nobutaka Fujii<sup>\*, †</sup>

<sup>†</sup>Graduate School of Pharmaceutical Sciences, Kyoto University

<sup>§</sup>Graduate School of Pharmaceutical Science, The University of Tokushima

\*e-mail: nfujii@pharm.kyoto-u.ac.jp

**General Methods.** <sup>1</sup>H NMR spectra were recorded using a JEOL AL-400 spectrometer. Chemical shifts are reported in  $\delta$  (ppm) relative to TMS (in CDCl<sub>3</sub>) or solvent peak (in D<sub>2</sub>O, CD<sub>3</sub>OD) as internal standard. <sup>13</sup>C NMR spectra were recorded using a JEOL AL-400 and referenced to the residual CHCl<sub>3</sub> signal. Exact mass (HRMS) spectra were recorded on a JMS-HX/HX 110A mass spectrometer. Optical rotations were measured with a Horiba high-sensitive polarimeter SEPA-200 (Kyoto, Japan). For flash chromatographies, Wakosil C-300 was employed. For HPLC separations, a Cosmosil 5C<sub>18</sub>-ARII analytical (4.6 x 250 mm, flow rate 1 mL/min) column and eluting products were detected by UV at 220 nm. A solvent system consisting of 0.1% aqueous TFA solution (v/v) and 0.1% TFA in CH<sub>3</sub>CN (v/v) were used for HPLC elution.

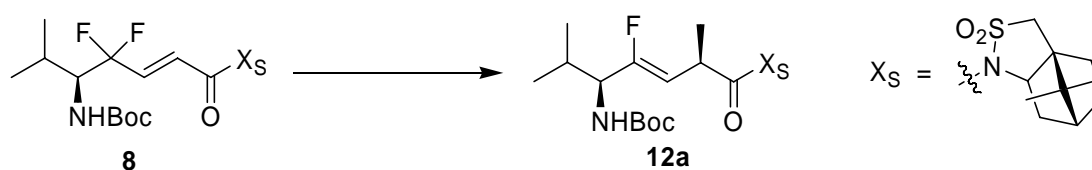

#### General Procedure for one-pot reduction/asymmetric alkylation via transmetalation. (2*R*,5*S*,3*Z*)-5-[*N*-(*tert*-Butoxycarbonyl)amino]-4-fluoro-2,6-dimethylhept-3-enoyl (*S*)-sultam (**12a**).

To a suspension of CuI (64.0 mg, 0.335 mmol) in THF (1 mL) was added dropwise a solution of MeLi·LiBr complex in Et<sub>2</sub>O (1.5 M, 0.45 mL, 0.670 mmol) at -78 °C under argon, and the mixture was stirred for 10 min at 0 °C. To the solution of the above organocopper reagent was added dropwise a solution of the *N*-enoyl sultam (*E*)-**8** (40.0 mg, 0.0815 mmol) in THF (1.5 mL) at -78 °C. The mixture was stirred for 30 min at -78 °C and HMPA (233  $\mu$ L, 1.34 mmol) was added dropwise to the mixture. After stirring for 30 min at -78 °C, a solution of triphenyltin chloride (64.6 mg, 0.168 mmol) in THF (1.5

ml) was added dropwise, and the mixture was then stirred for 30 min at  $-40\text{ }^{\circ}\text{C}$  and methyl iodide (0.095 ml, 0.670 mmol) was added dropwise. The mixture was stirred for 20 h at  $-40\text{ }^{\circ}\text{C}$ . The reaction was quenched at  $-40\text{ }^{\circ}\text{C}$  by addition of a 1:1 saturated  $\text{NH}_4\text{Cl}$ -28%  $\text{NH}_4\text{OH}$  solution (4 mL) with additional stirring at room temperature for 30 min. The mixture was extracted with  $\text{Et}_2\text{O}$  and the extract was washed with brine and dried over  $\text{MgSO}_4$ . Concentration under reduced pressure followed by flash chromatography over silica gel with *n*-hexane-EtOAc (5:1) gave the title compound **12a** (36.9 mg, 93% yield) as a colorless oil;  $[\alpha]_D^{24.3} = -95.5$  (c 0.945,  $\text{CHCl}_3$ );  $^1\text{H}$  NMR (400 MHz,  $\text{CDCl}_3$ )  $\delta$  0.92–0.94 (m, 6H), 0.97 (s, 3H), 1.16 (s, 3H), 1.19–1.41 (m, 2H), 1.33 (d,  $J = 7.1\text{ Hz}$ , 3H), 1.44 (s, 9H), 1.81–1.96 (m, 4H), 2.02–2.06 (m, 2H), 3.42–3.52 (m, 2H), 3.86–3.97 (m, 1H), 3.89 (t,  $J = 6.1\text{ Hz}$ , 1H), 4.12–4.19 (m, 1H), 4.70 (d,  $J = 9.8\text{ Hz}$ , 1H), 5.02 (dd,  $J = 37.8, 9.0\text{ Hz}$ , 1H);  $^{13}\text{C}$  NMR (100 MHz,  $\text{CDCl}_3$ )  $\delta$  18.4, 19.3, 19.8, 20.8 (2C), 26.4, 28.3 (3C), 30.4, 32.8, 35.9, 38.3, 44.6, 47.7, 48.4, 53.0, 57.4, 65.0, 79.6, 105.9, 155.7, 157.4, 173.8; HRMS (FAB),  $m/z$  calcd for  $\text{C}_{24}\text{H}_{40}\text{FN}_2\text{O}_5\text{S}$  ( $\text{MH}^+$ ) 487.2642, found 487.2636.

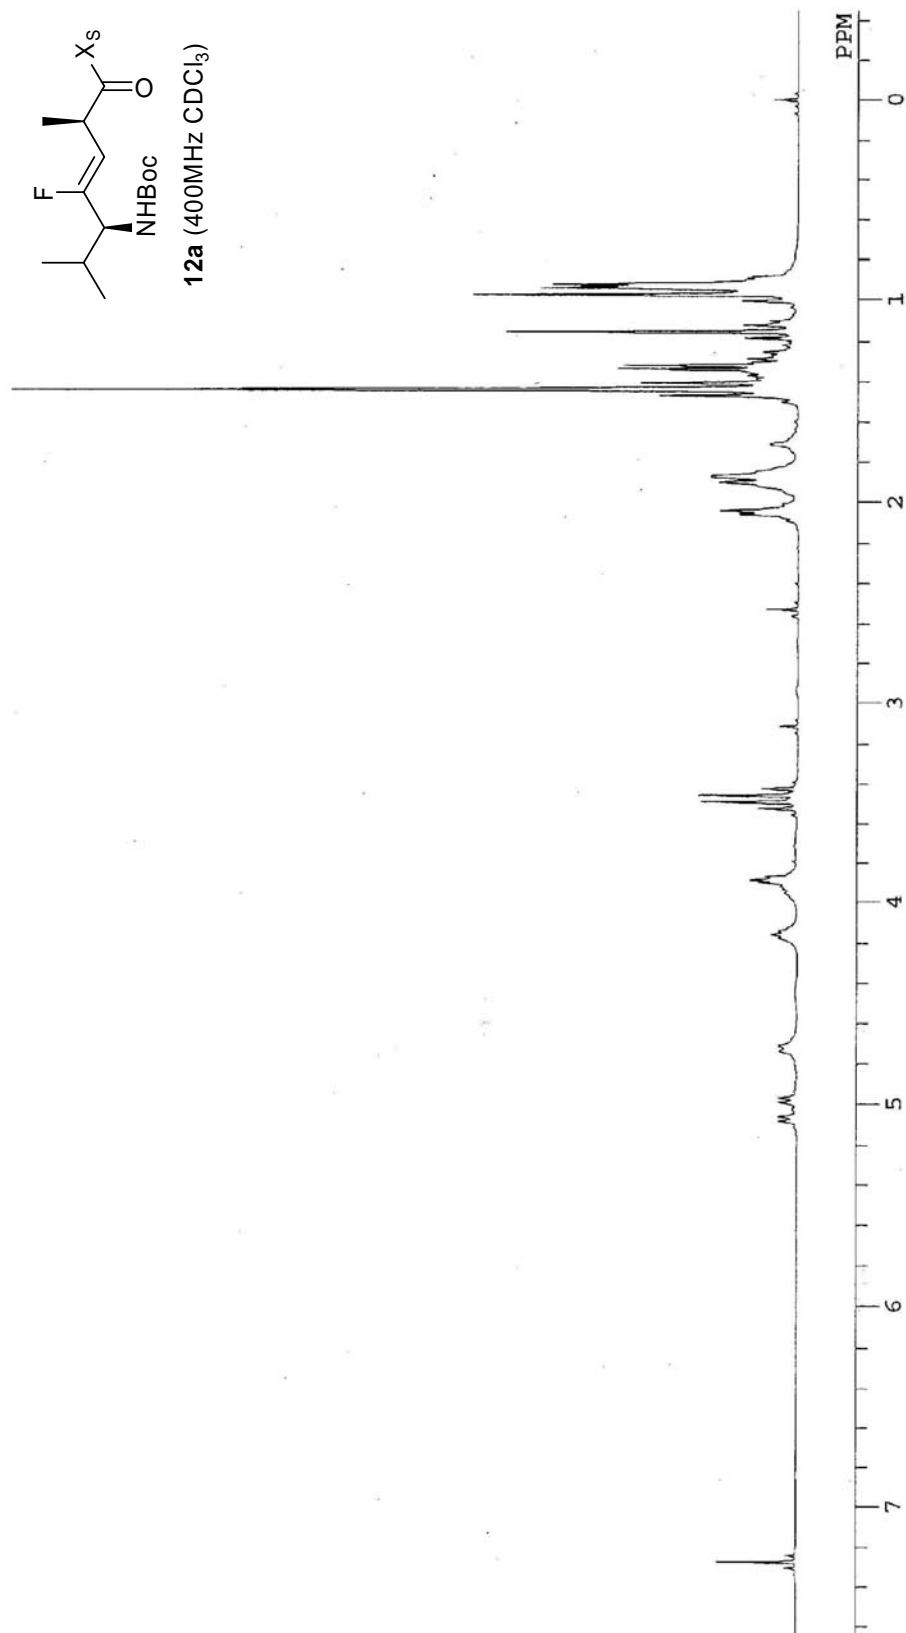

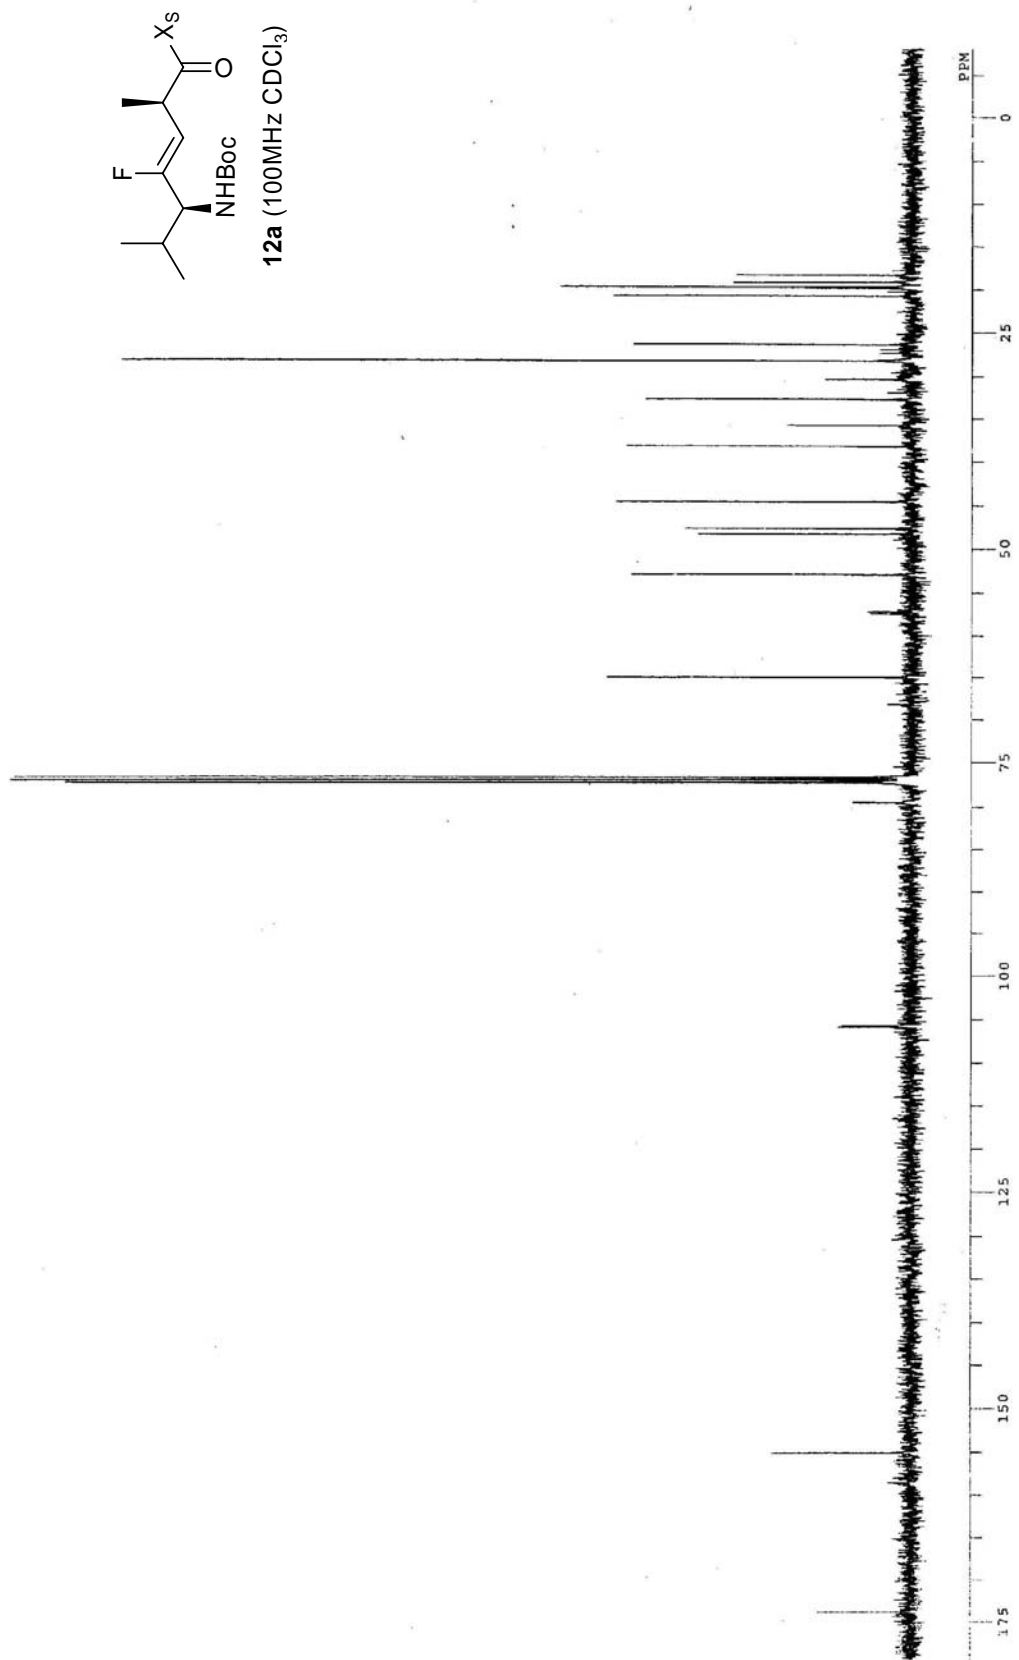

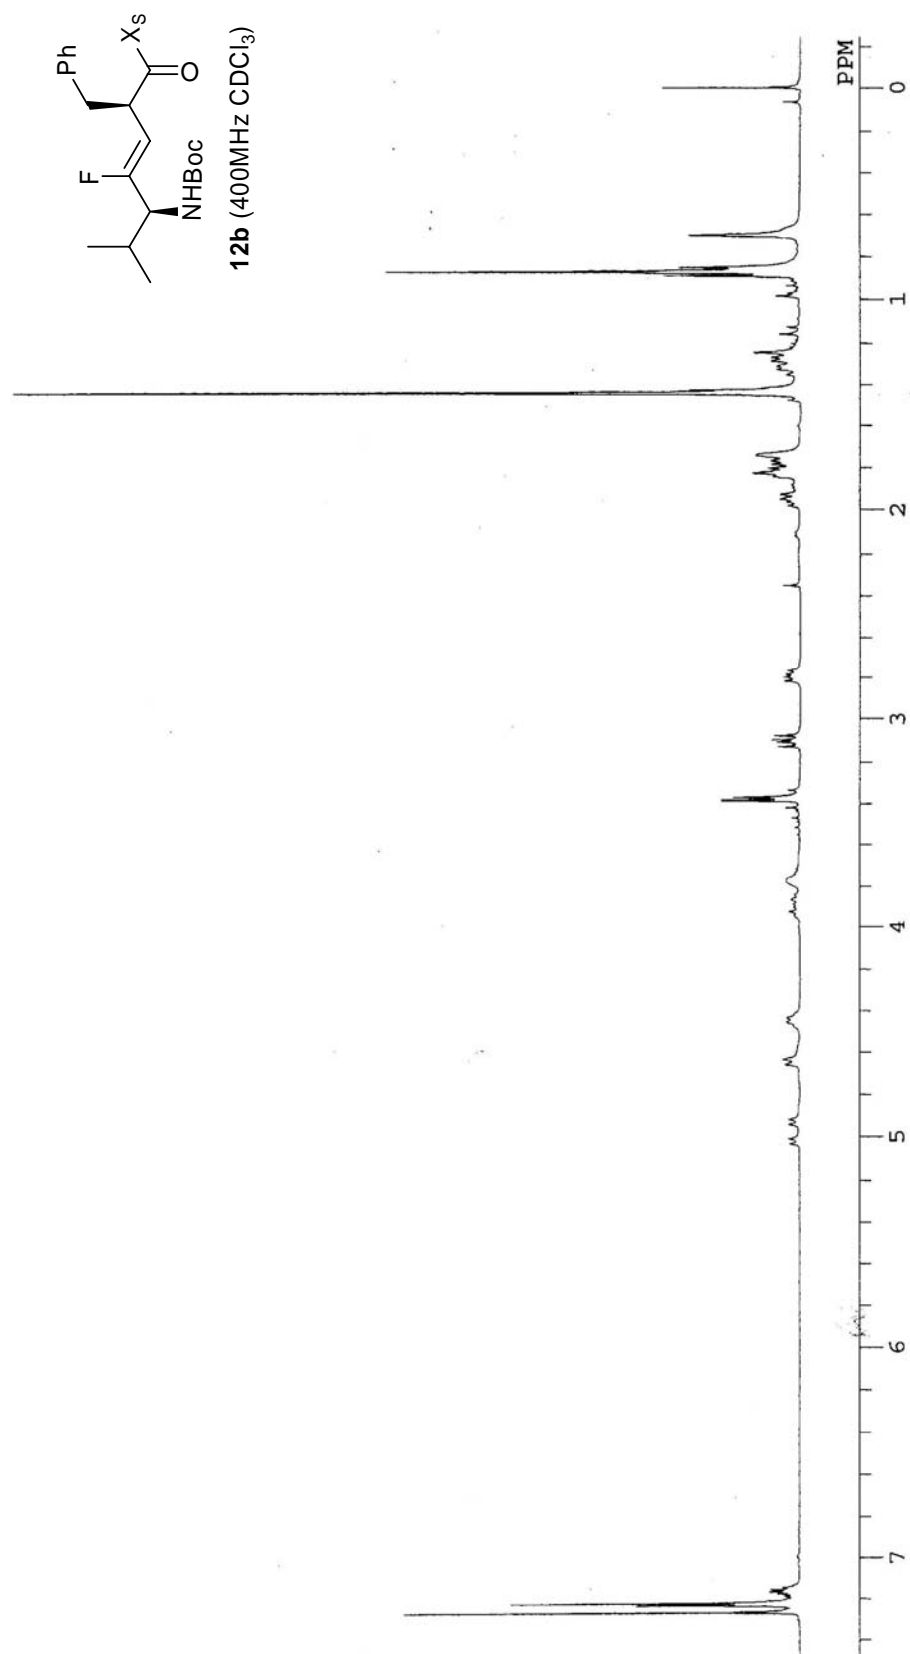

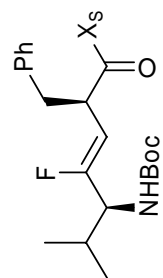

12b (100MHz CDCl<sub>3</sub>)

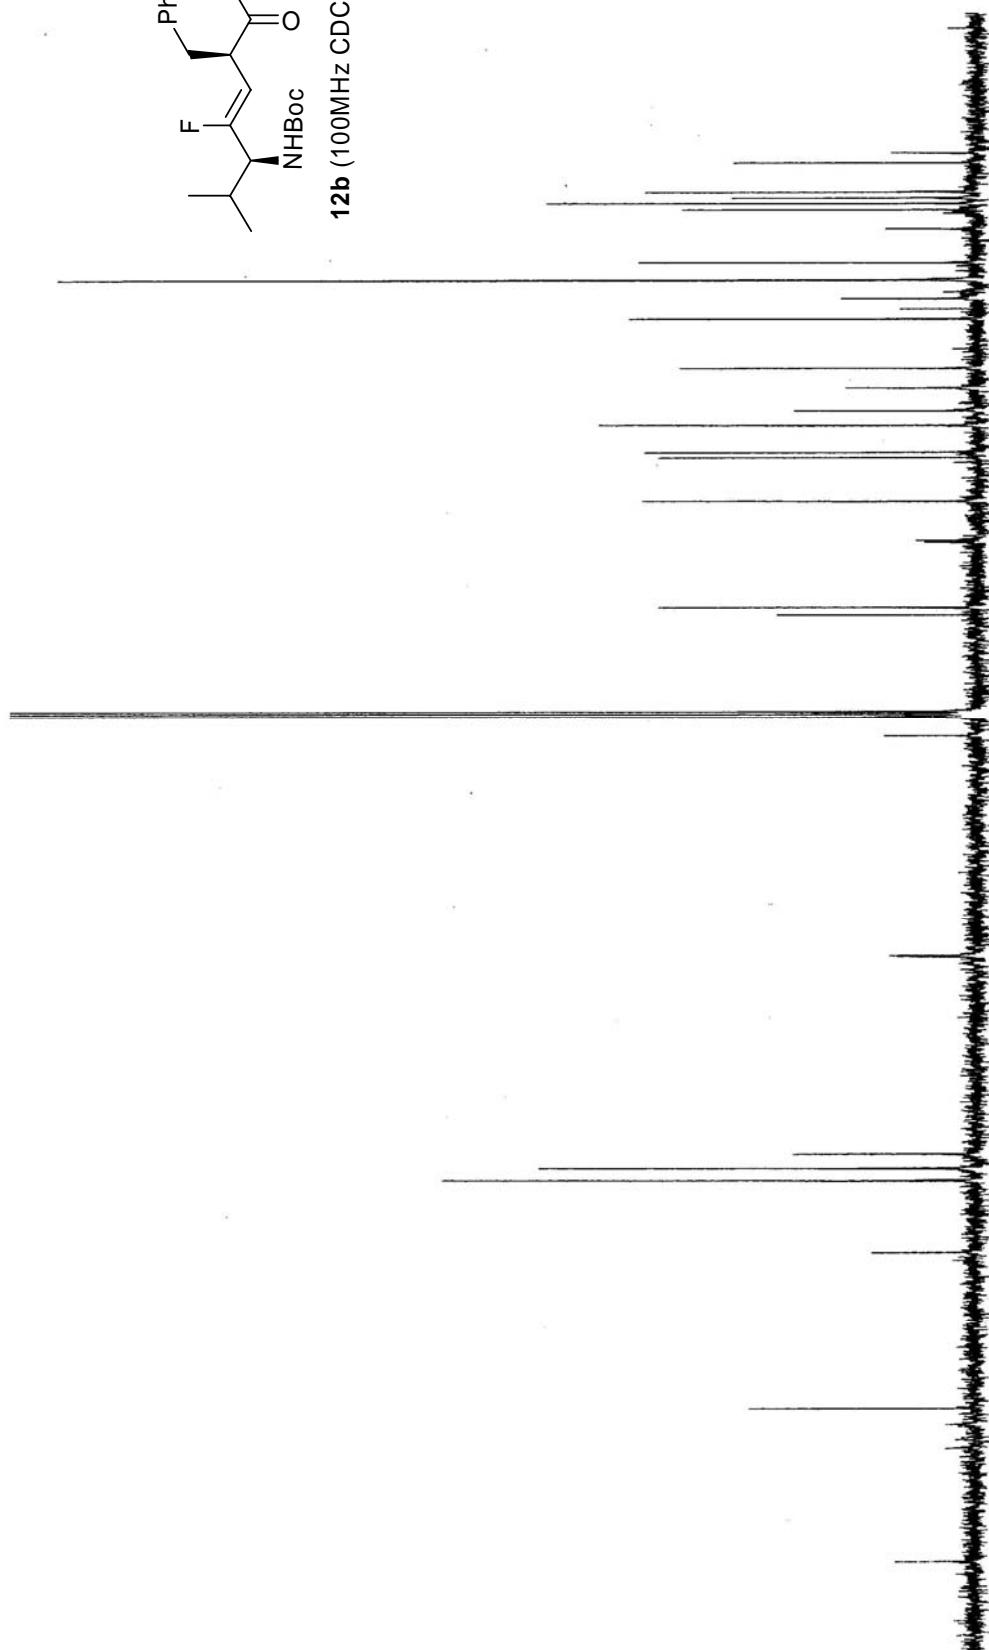

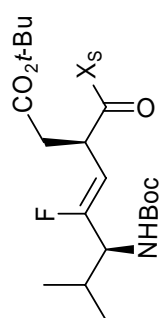

**12c** (400MHz CDCl<sub>3</sub>)

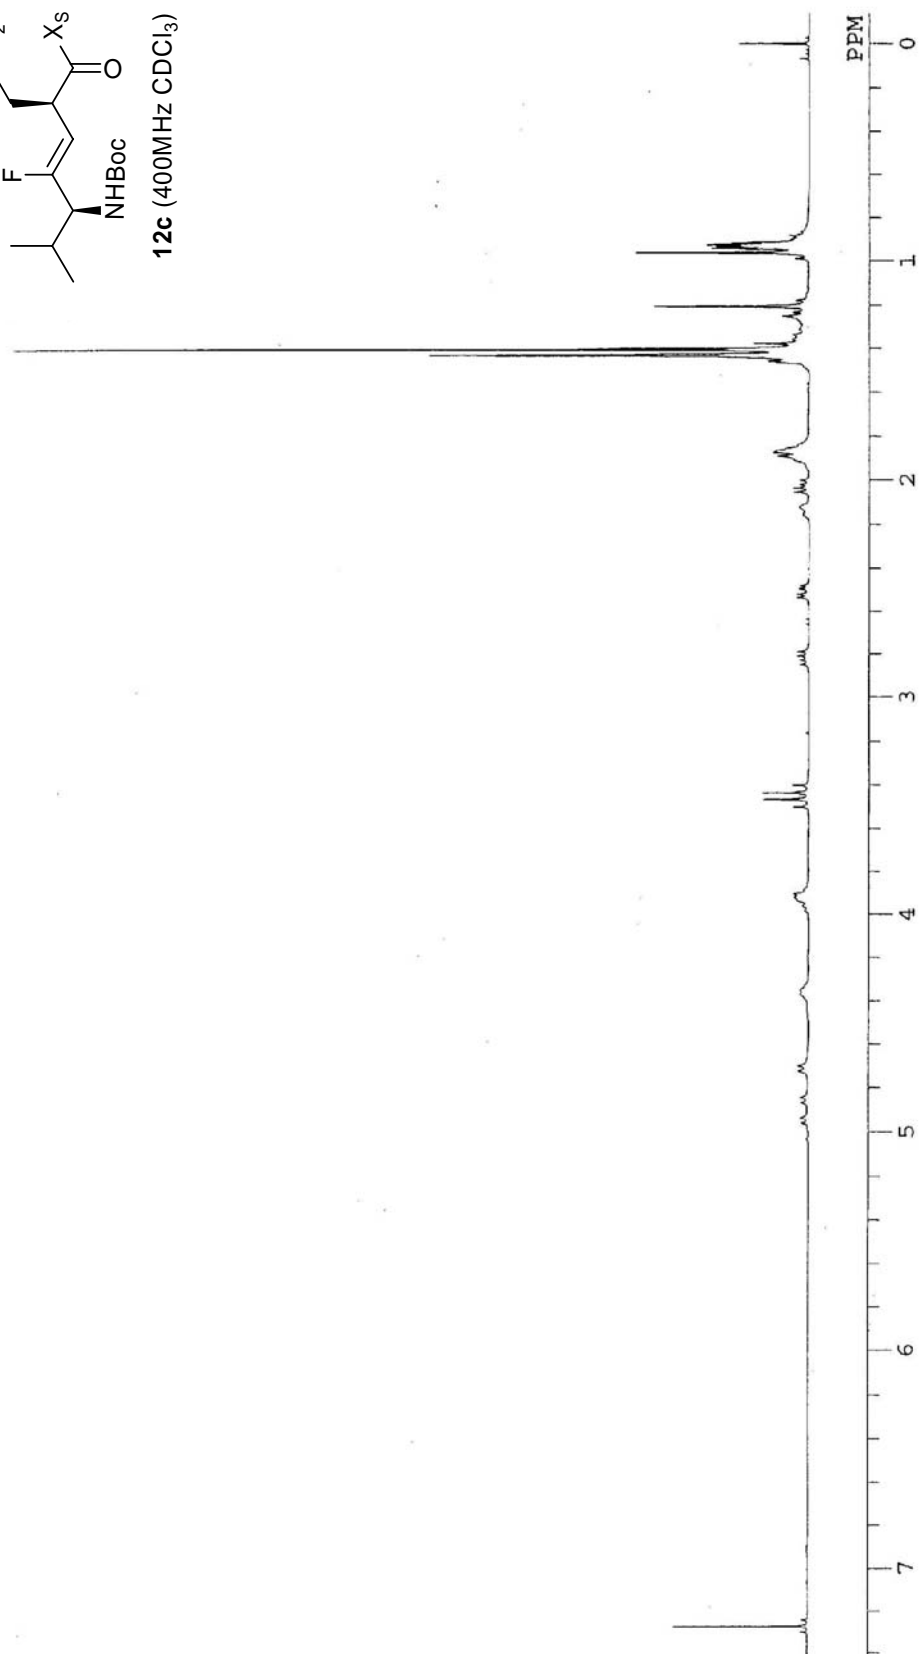

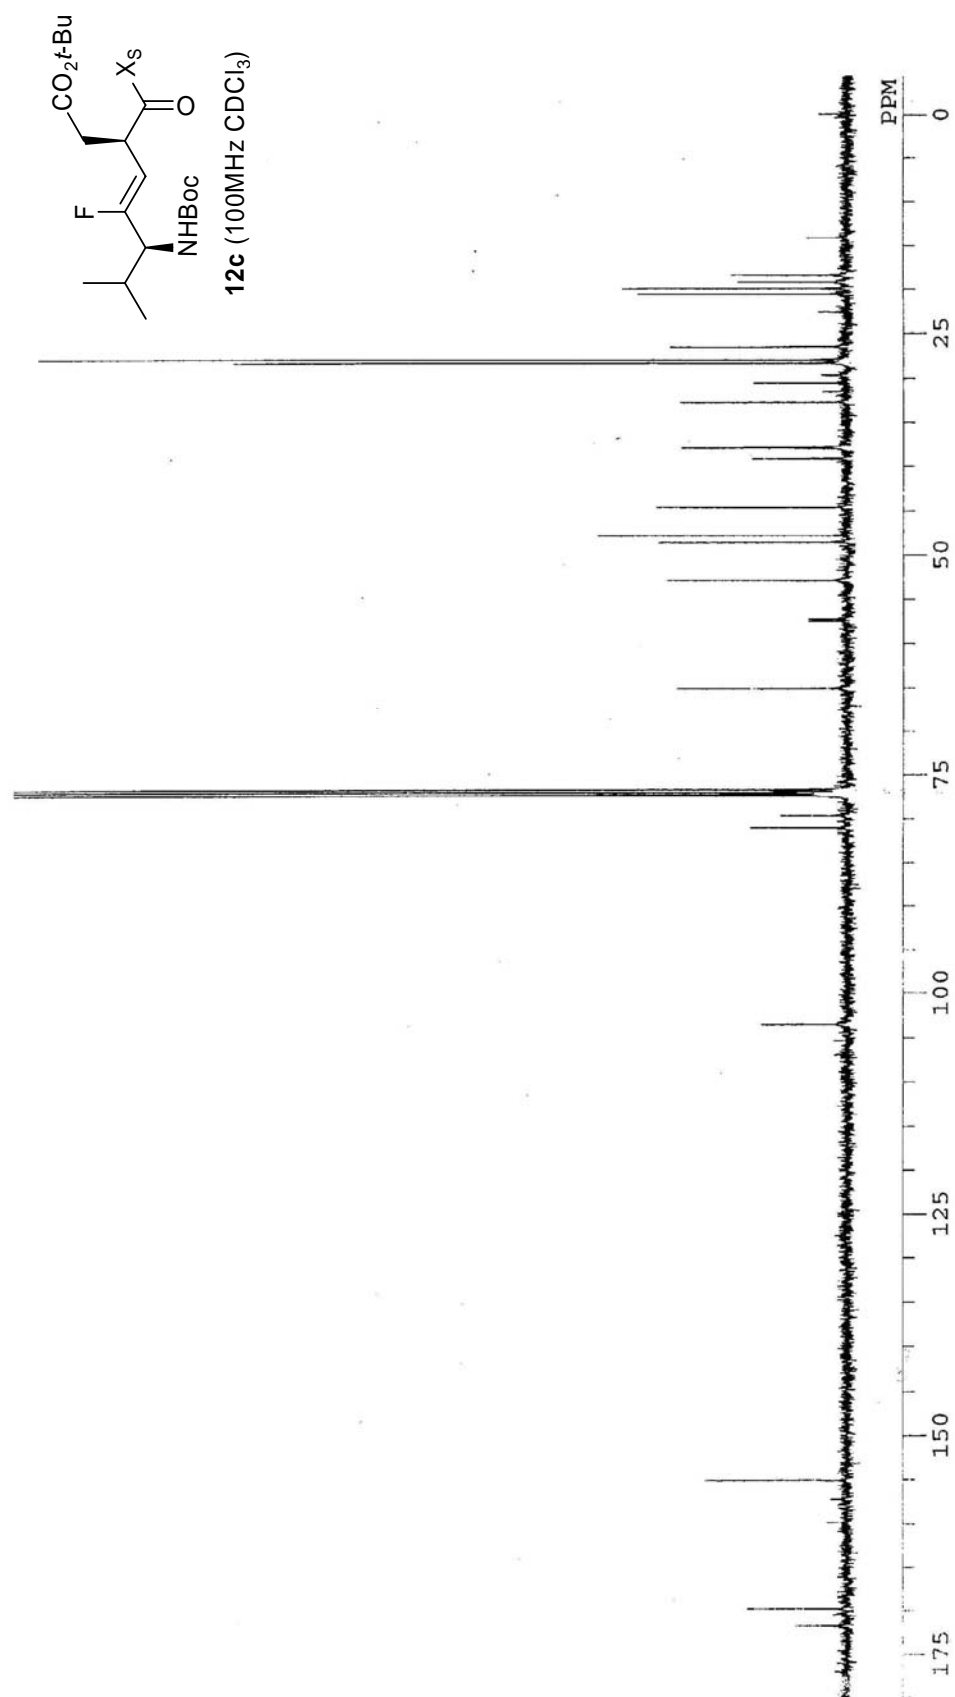



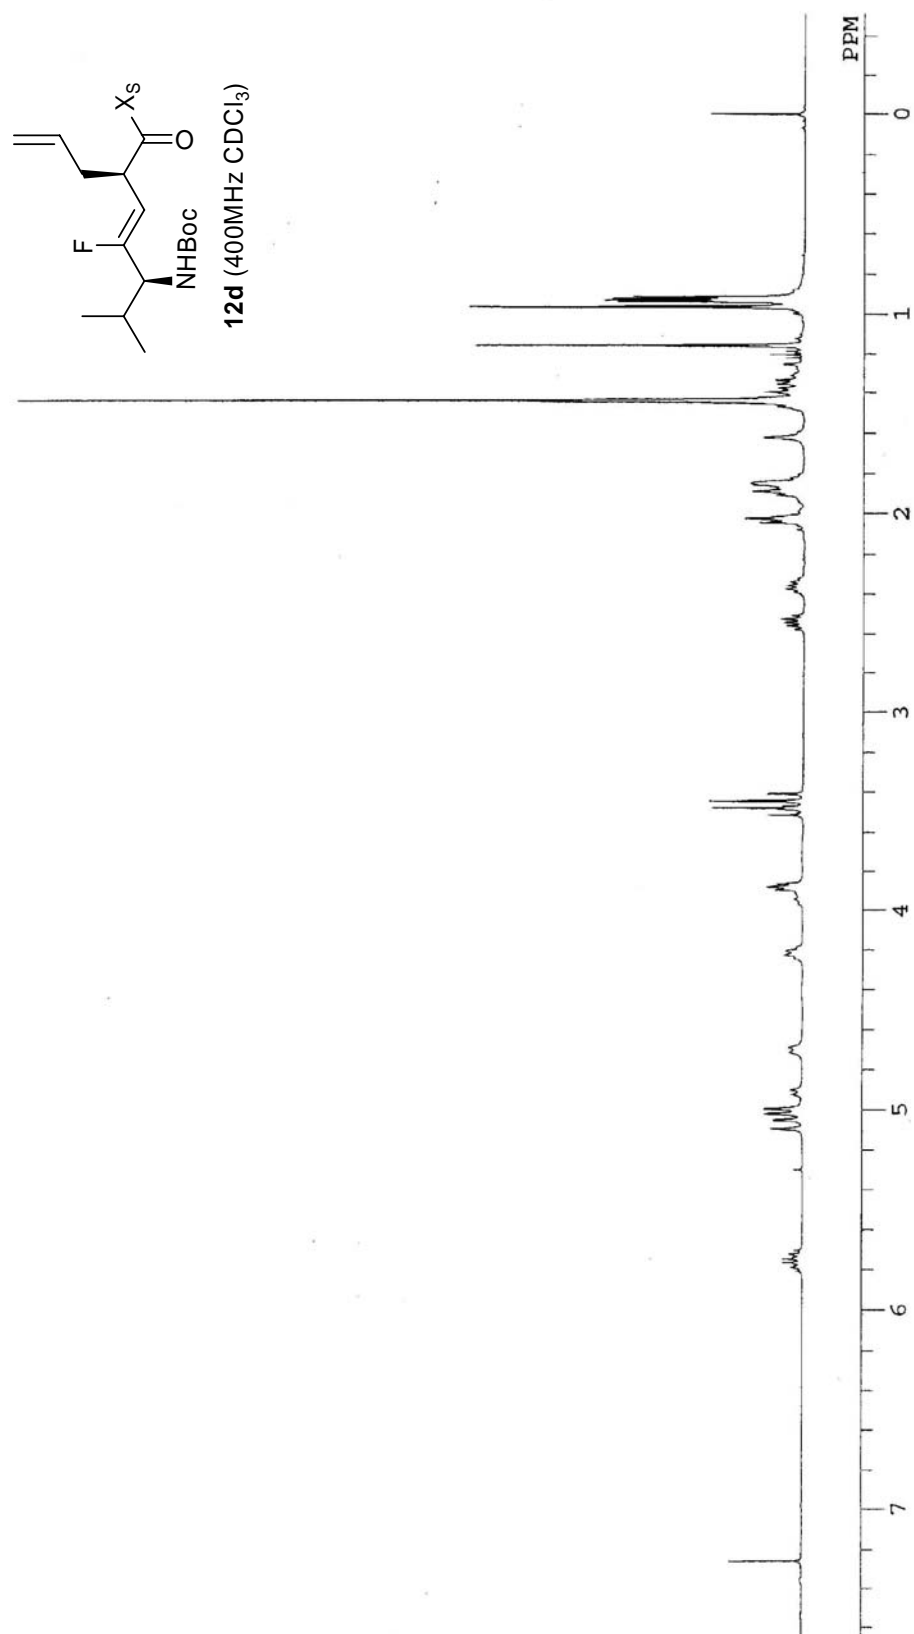

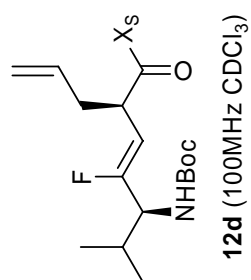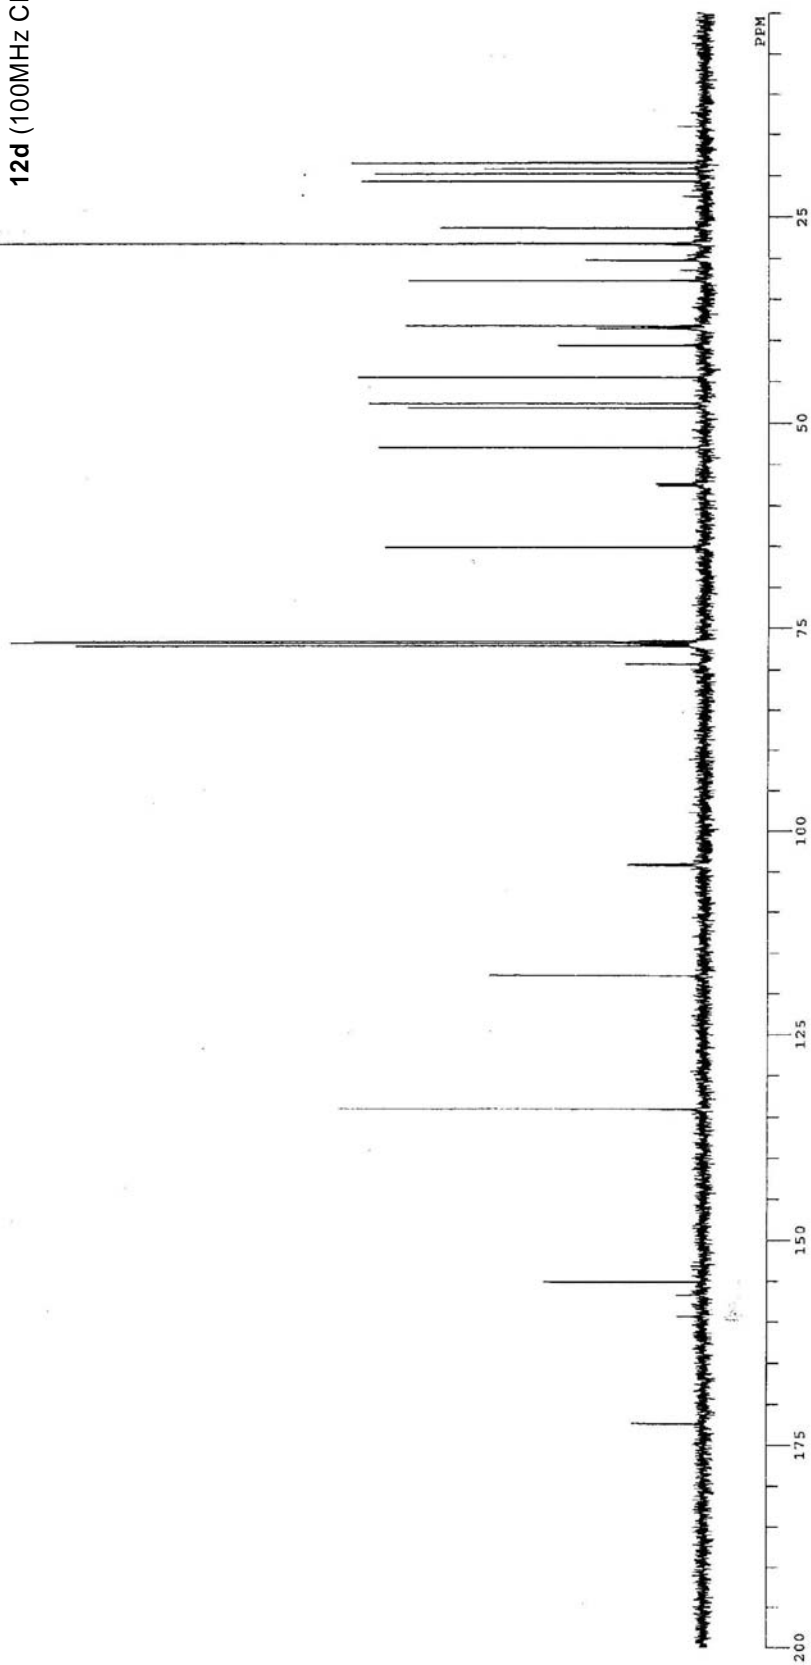

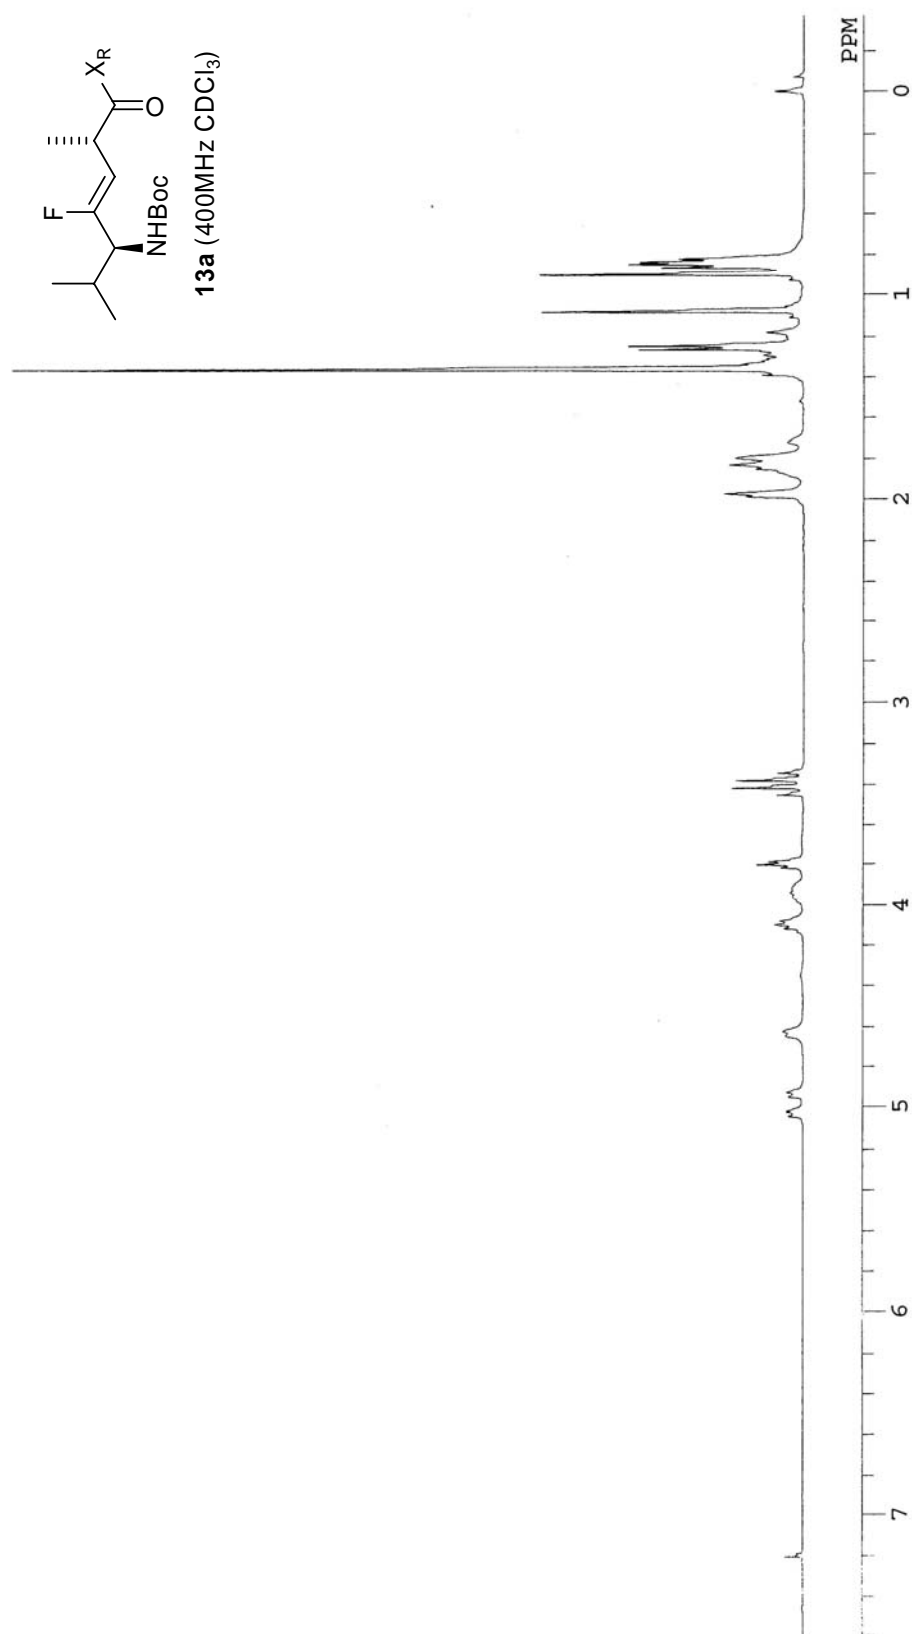

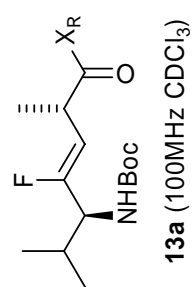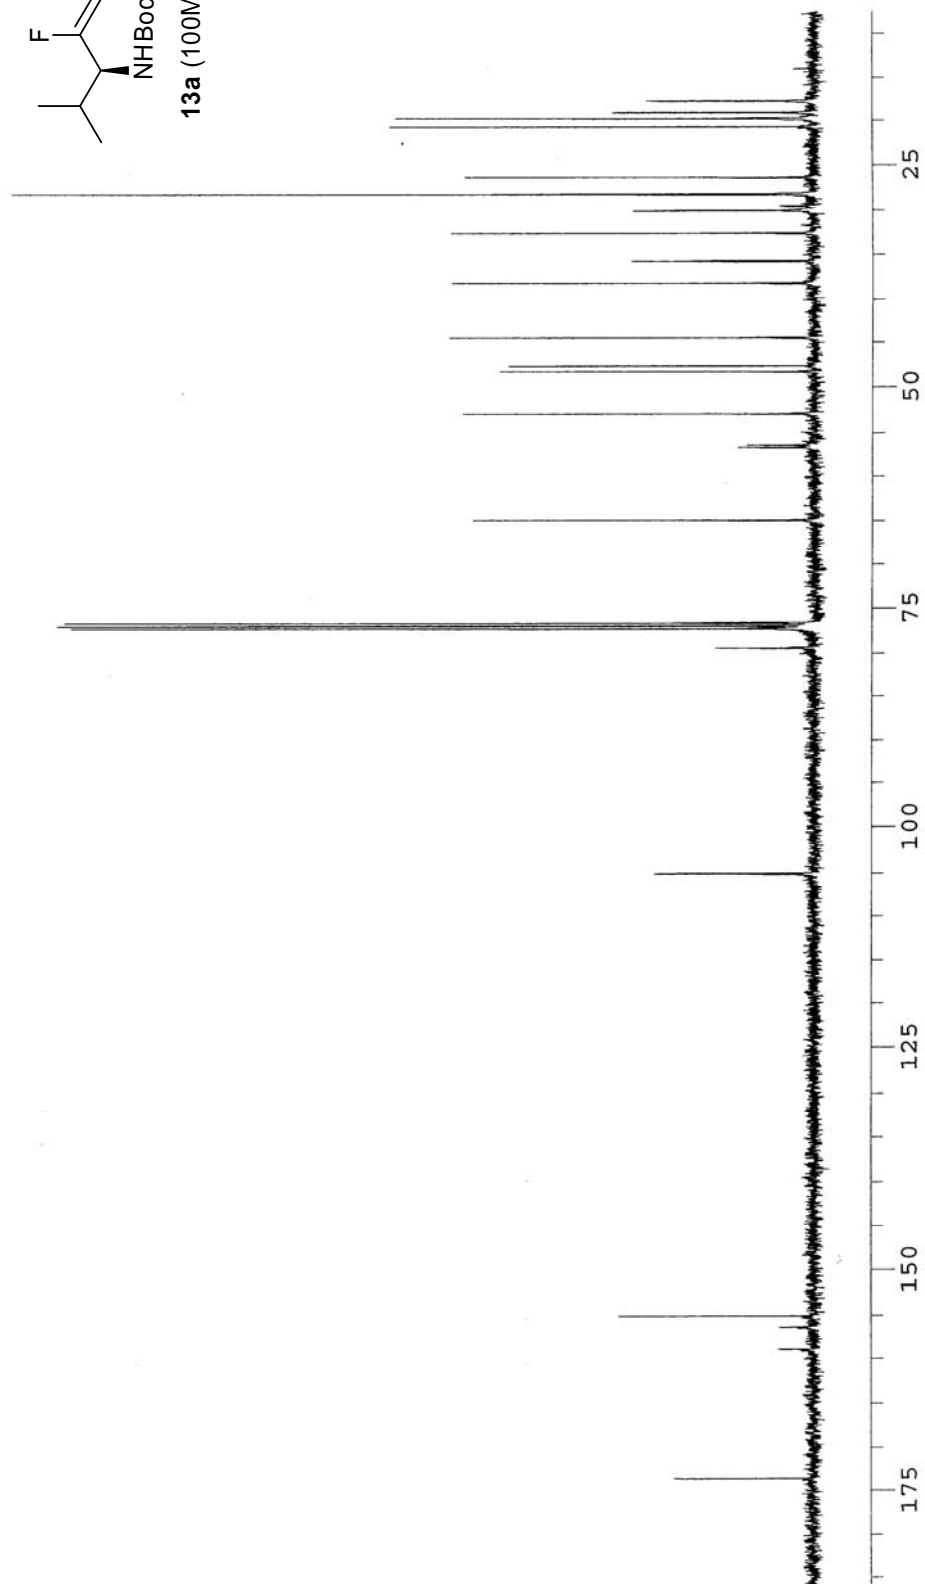

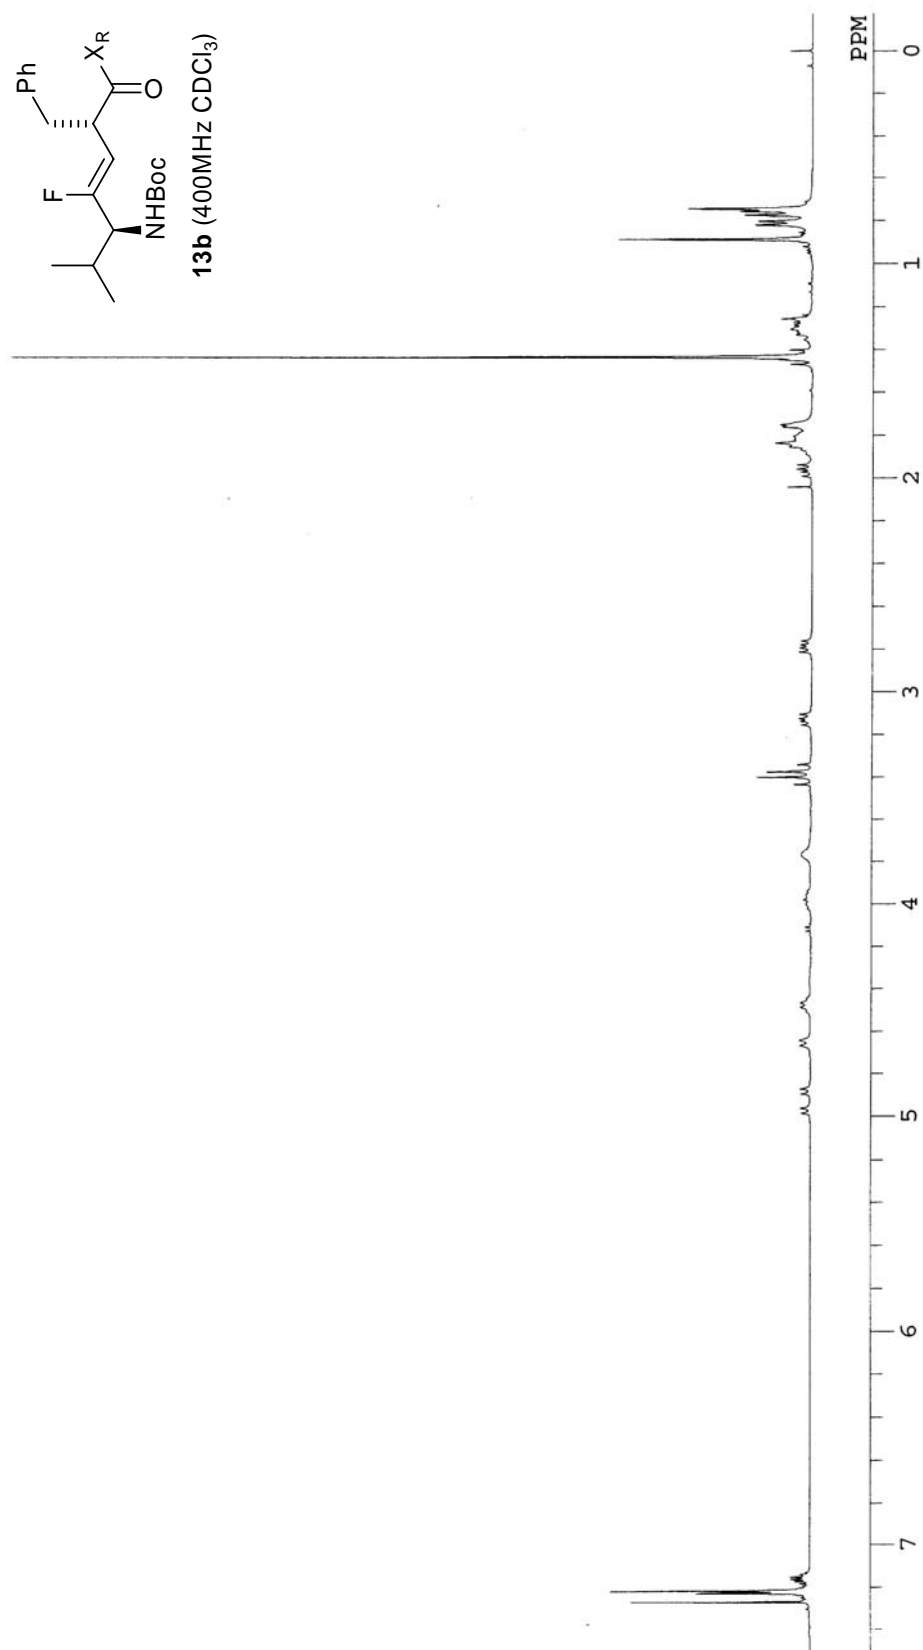

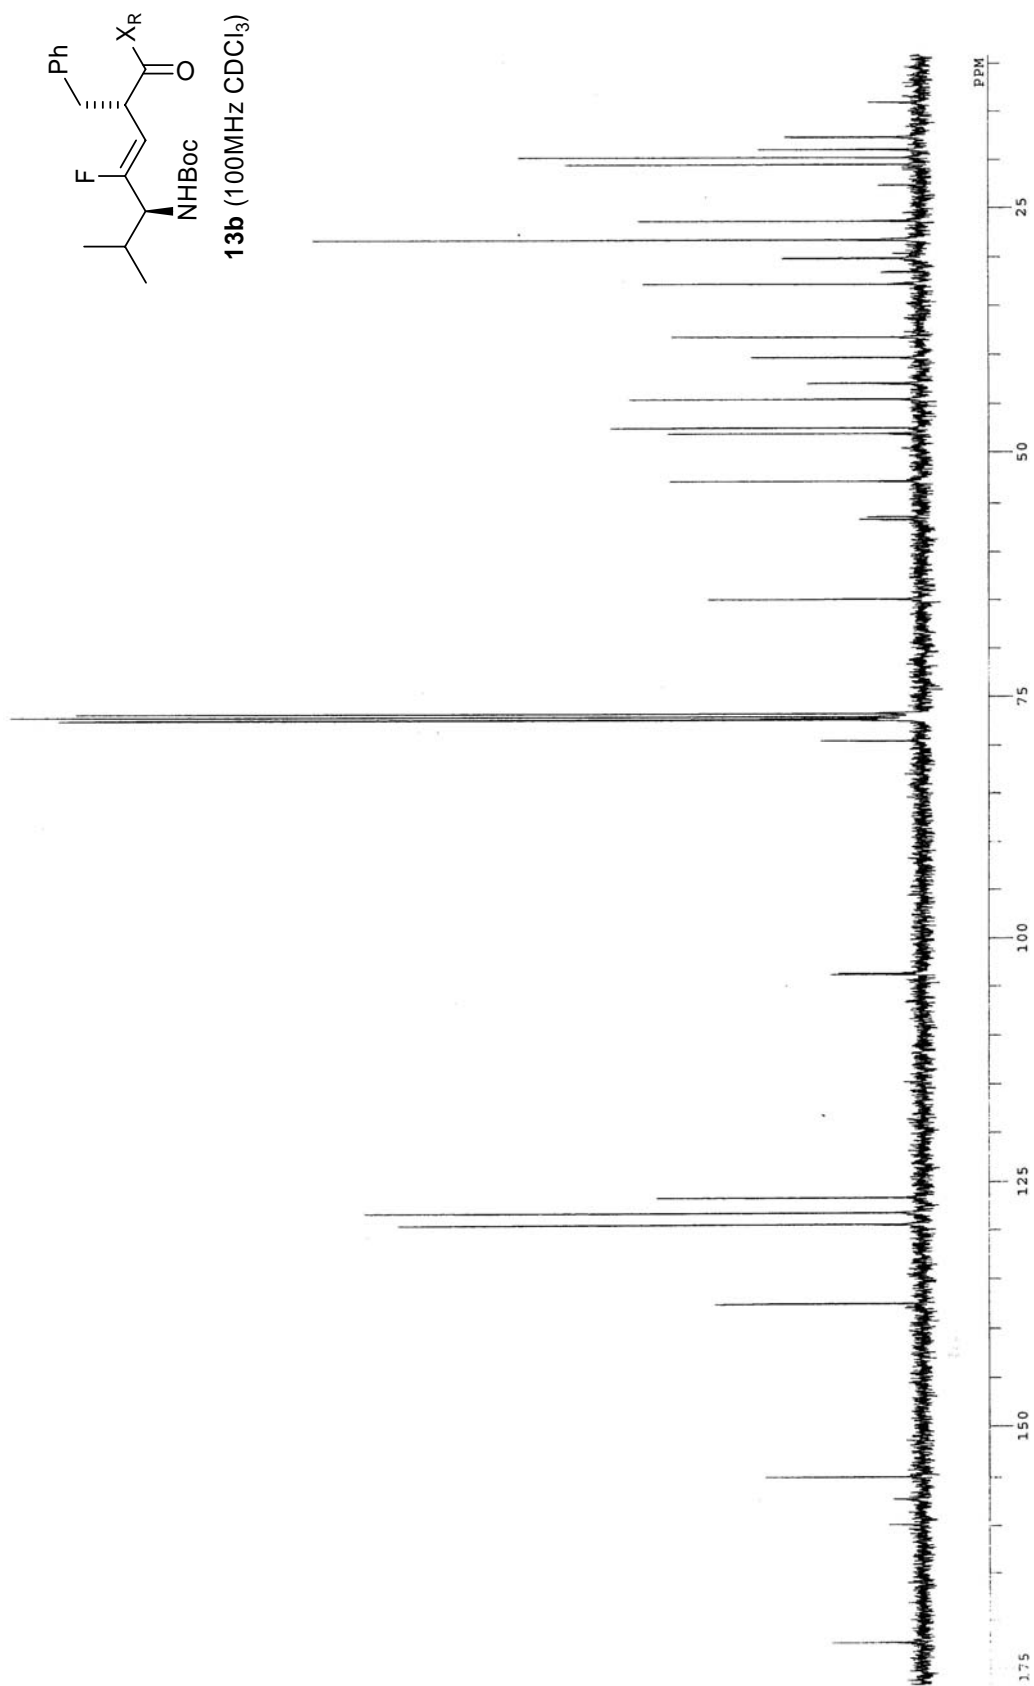

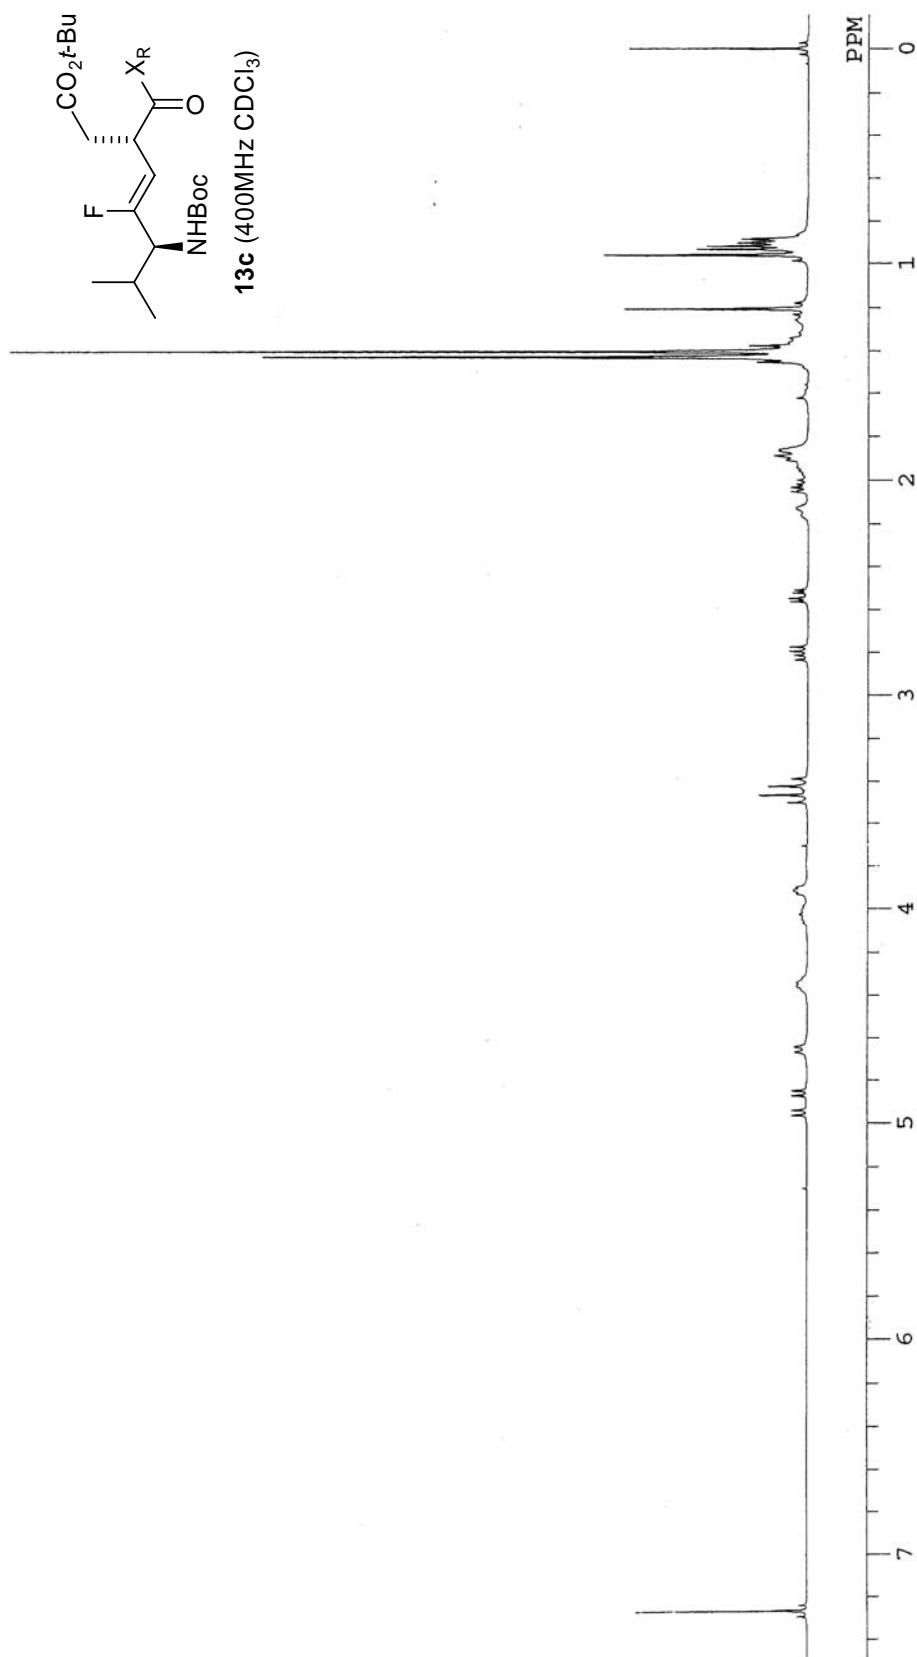

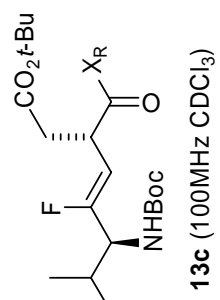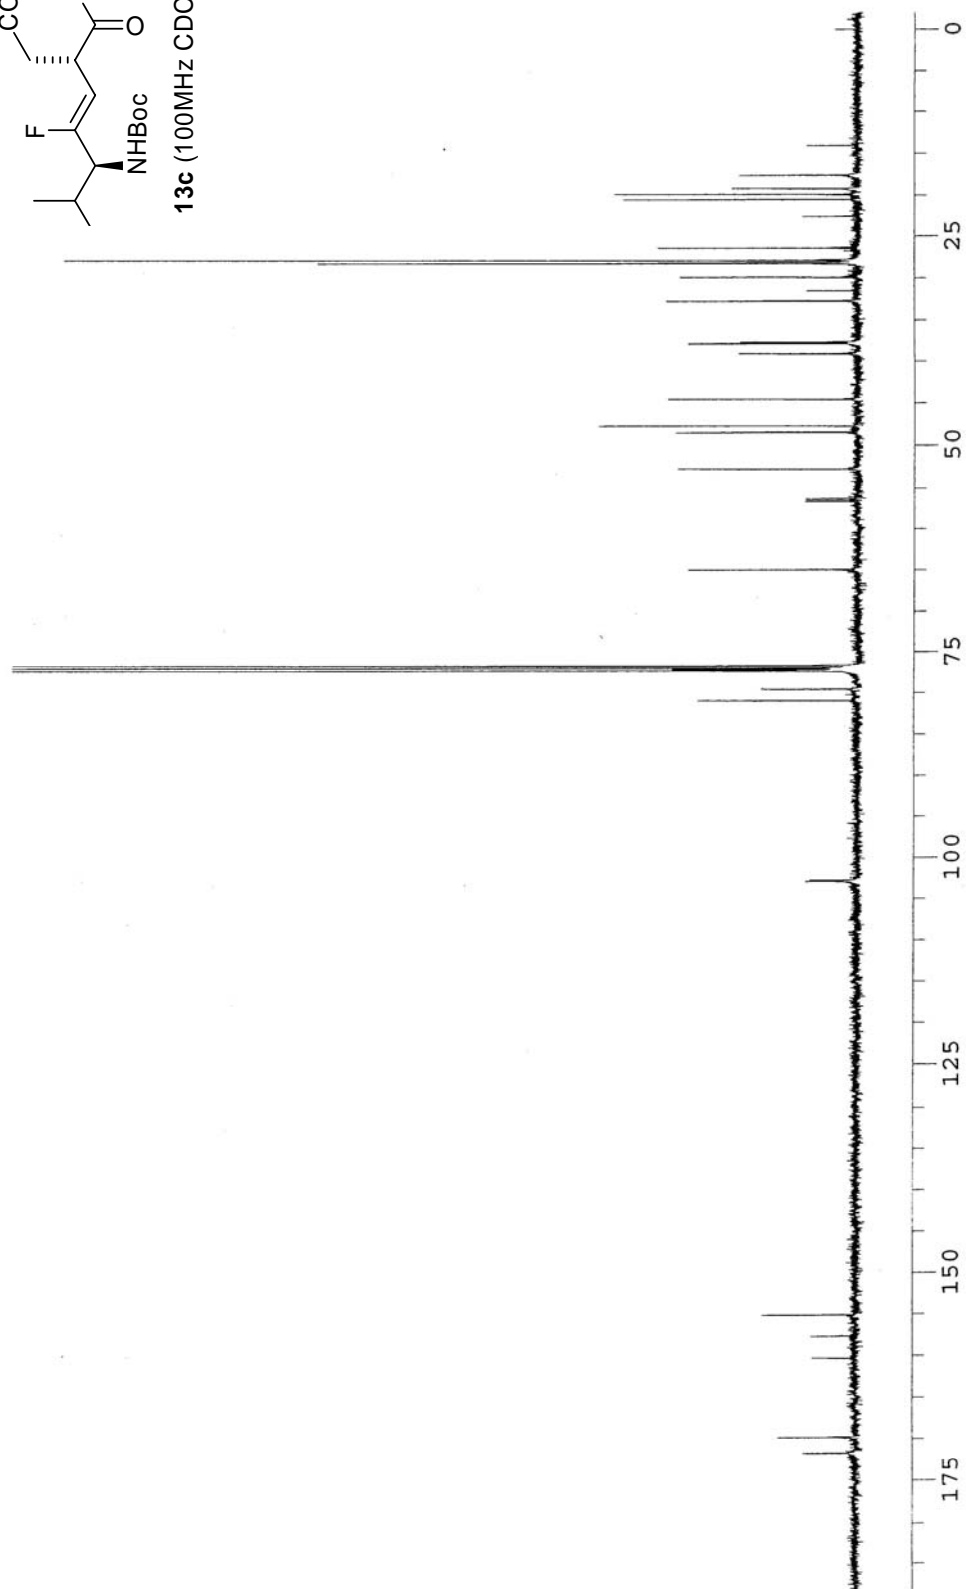



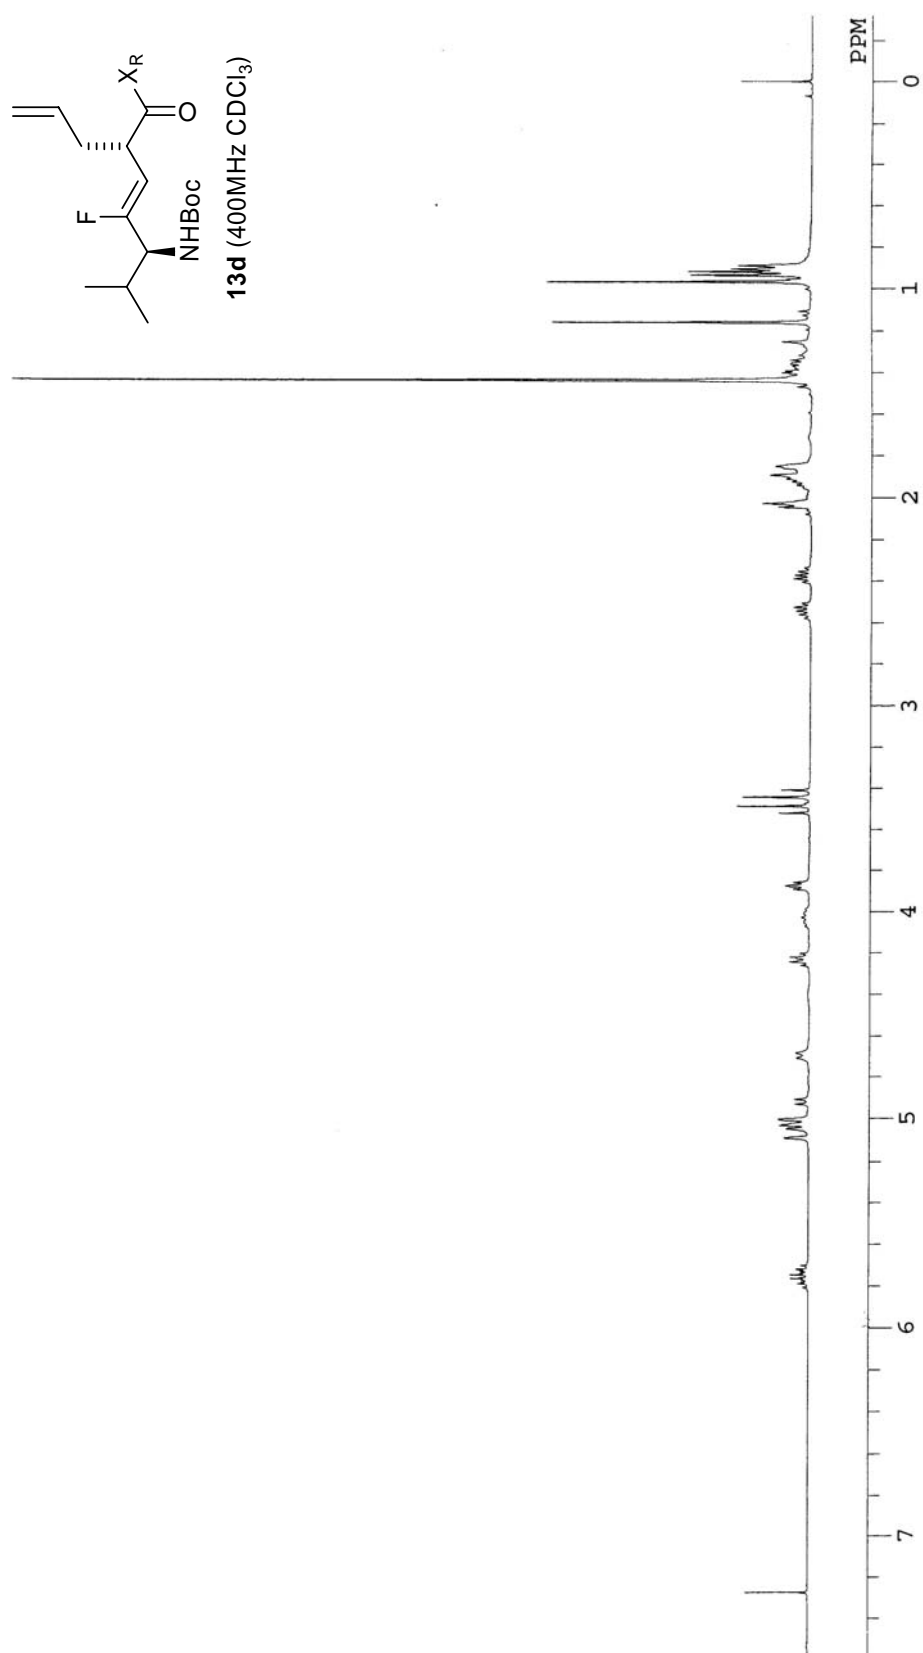

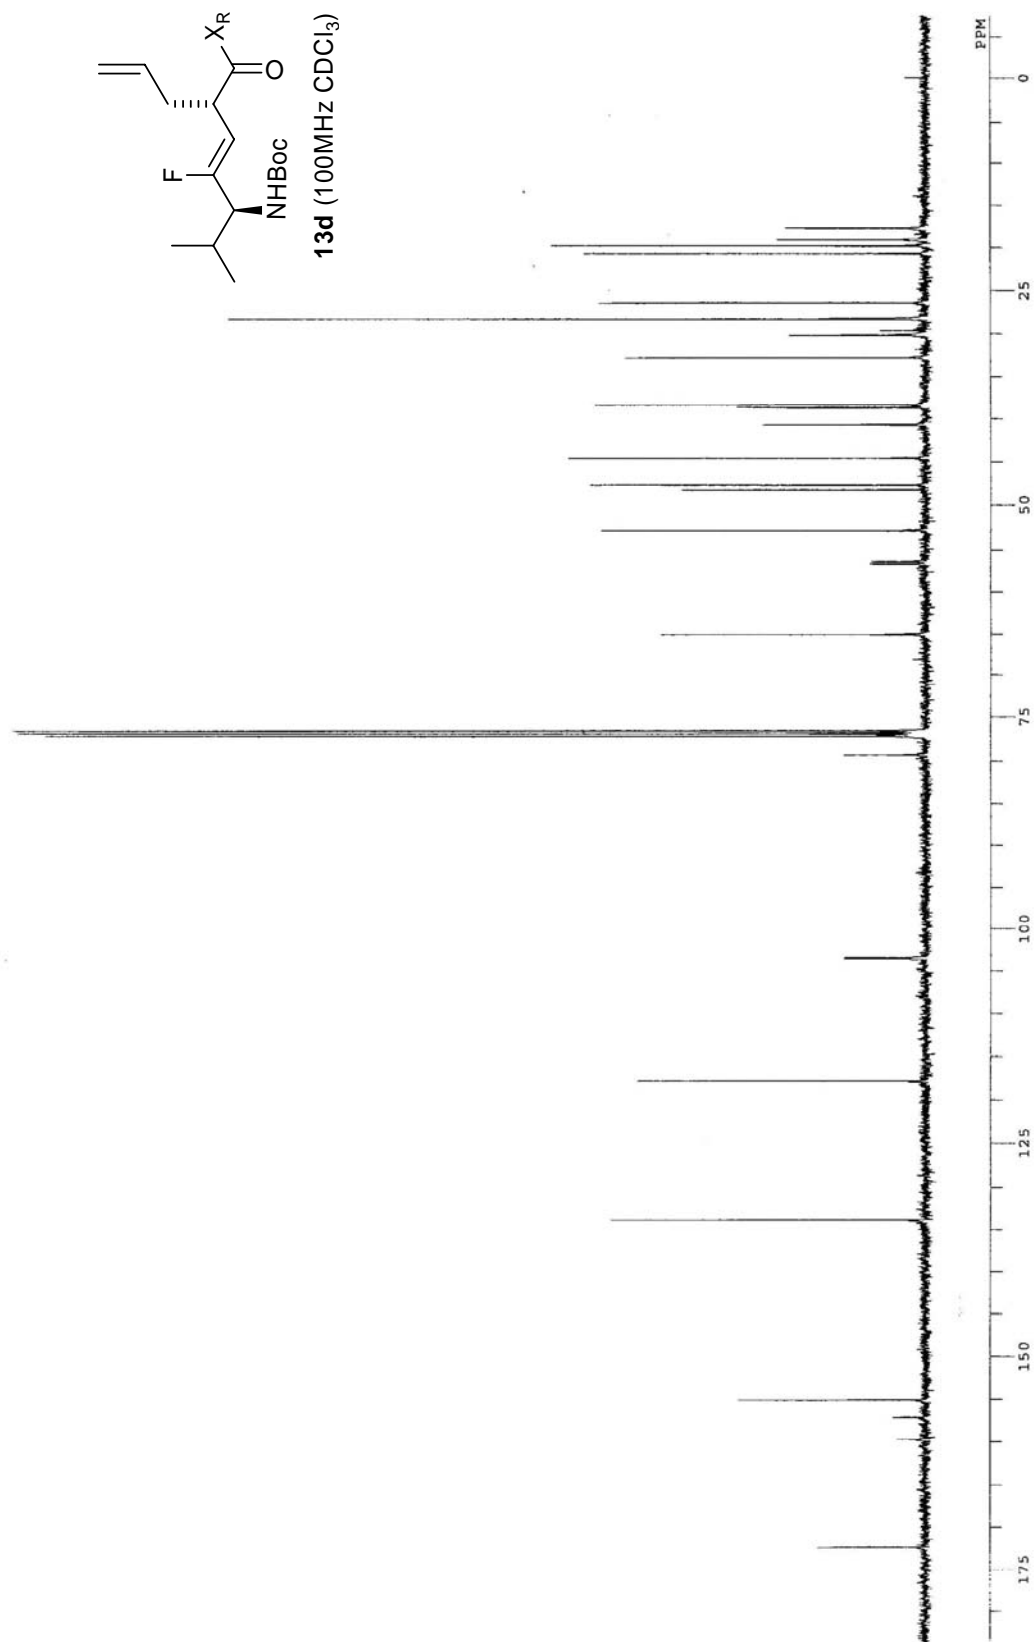

# CD Spectra of L-Val-L/D-Ala-OMe (100 $\mu$ M)

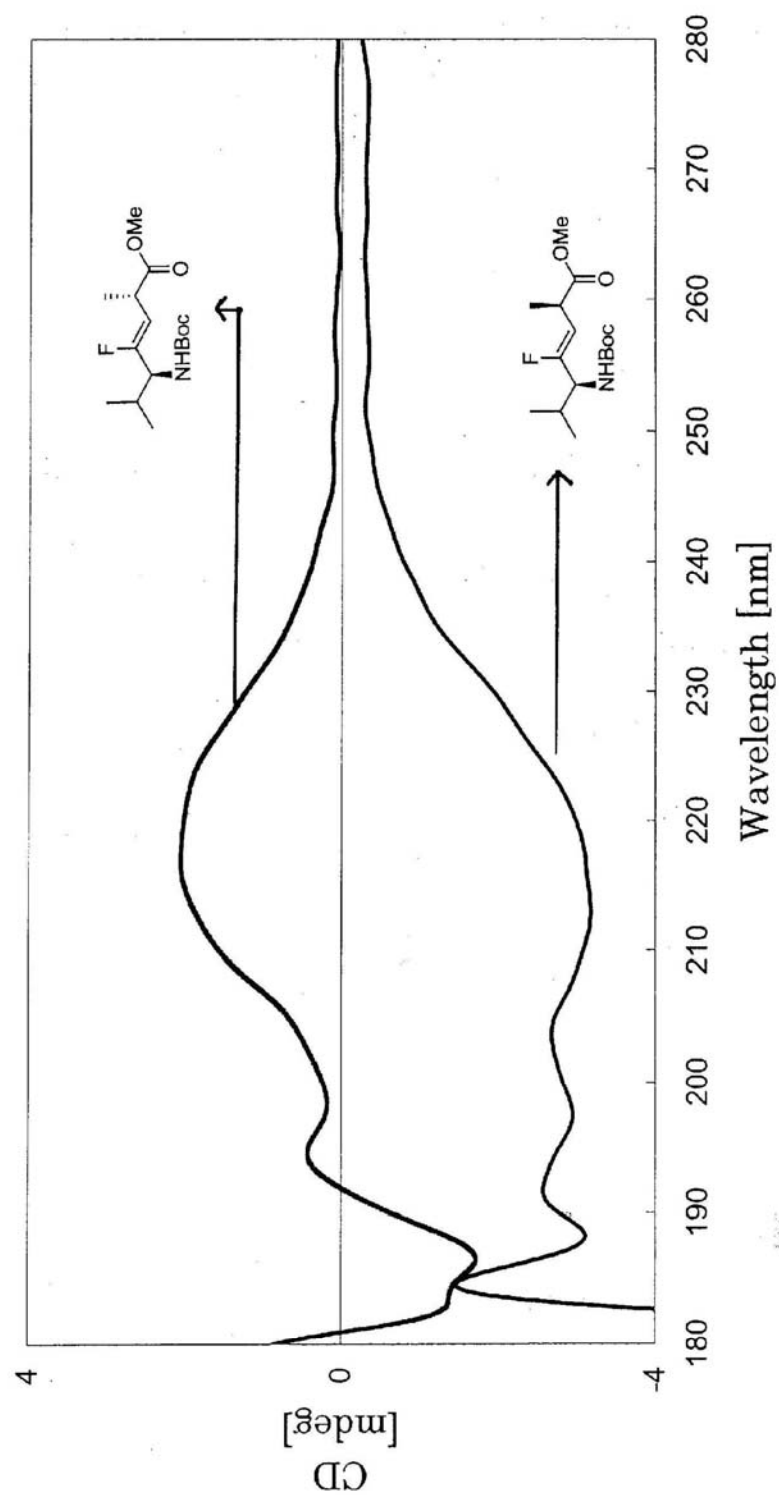

Supplement: b608596b.pdf [file b608596b.pdf]
